# Supplementary figures and images for: Insights into the Oncogenic, Prognostic, and Immunological Role of BRIP1 in Pan-Cancer: A Comprehensive Data-Mining-Based Study
Source: Hindawi journal article supplement (doi:10.1155/2023/4104639), 2023-04-28

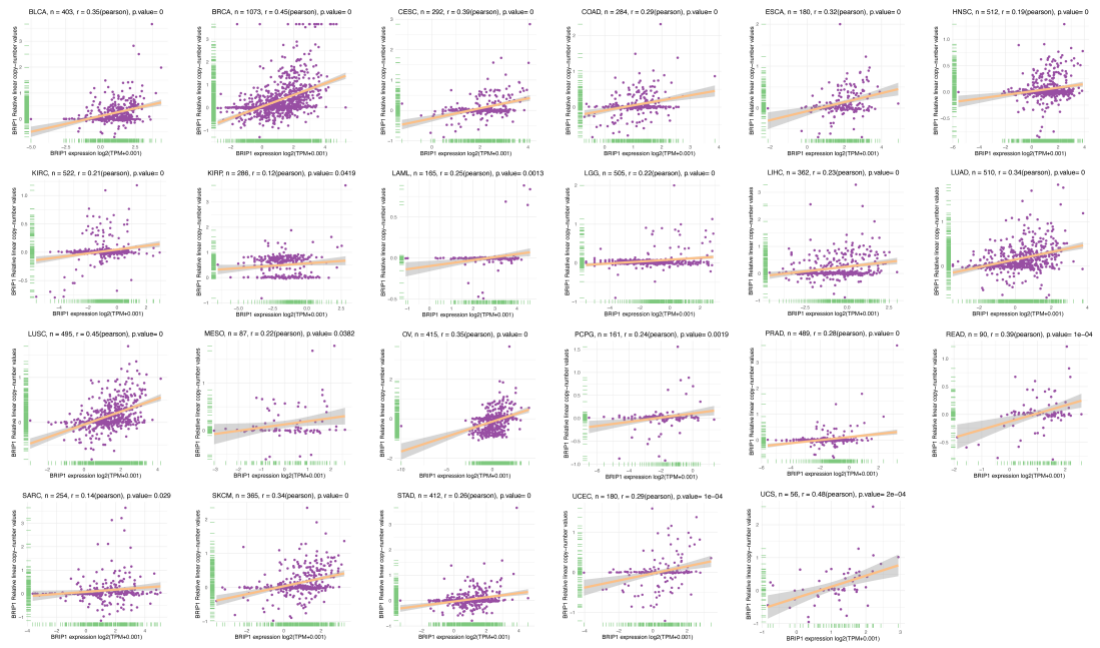

Supplement: f1 [file 4104639.f1.zip]

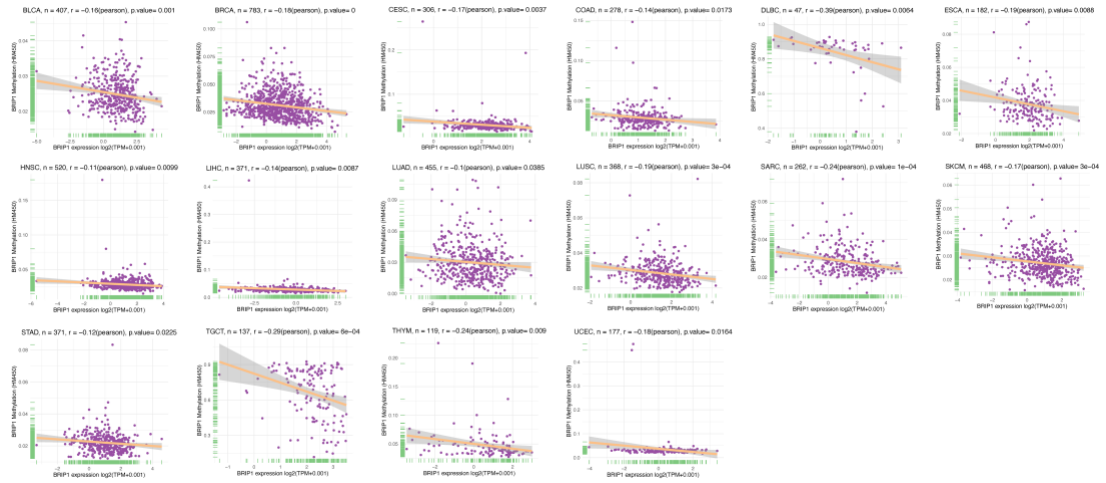

Supplement: f1 [file 4104639.f1.zip]

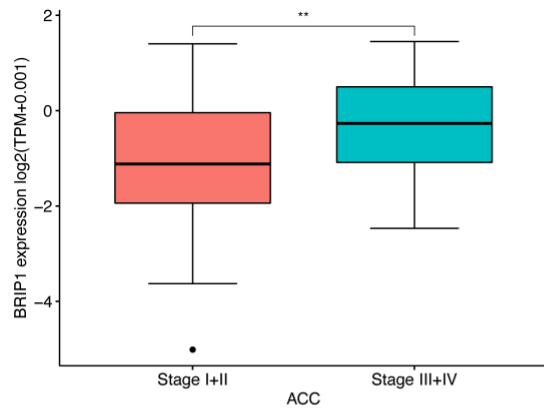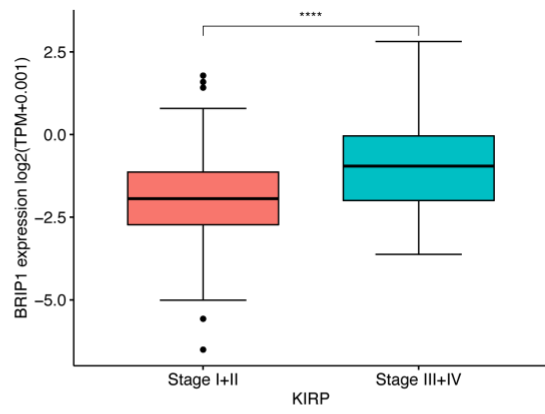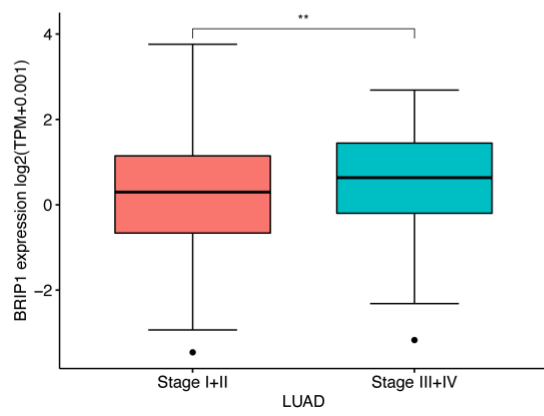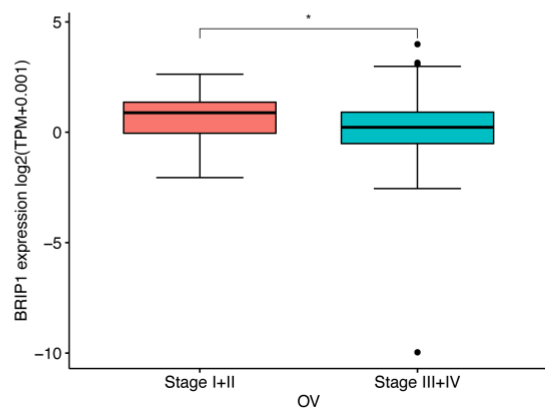

Supplement: f1 [file 4104639.f1.zip]

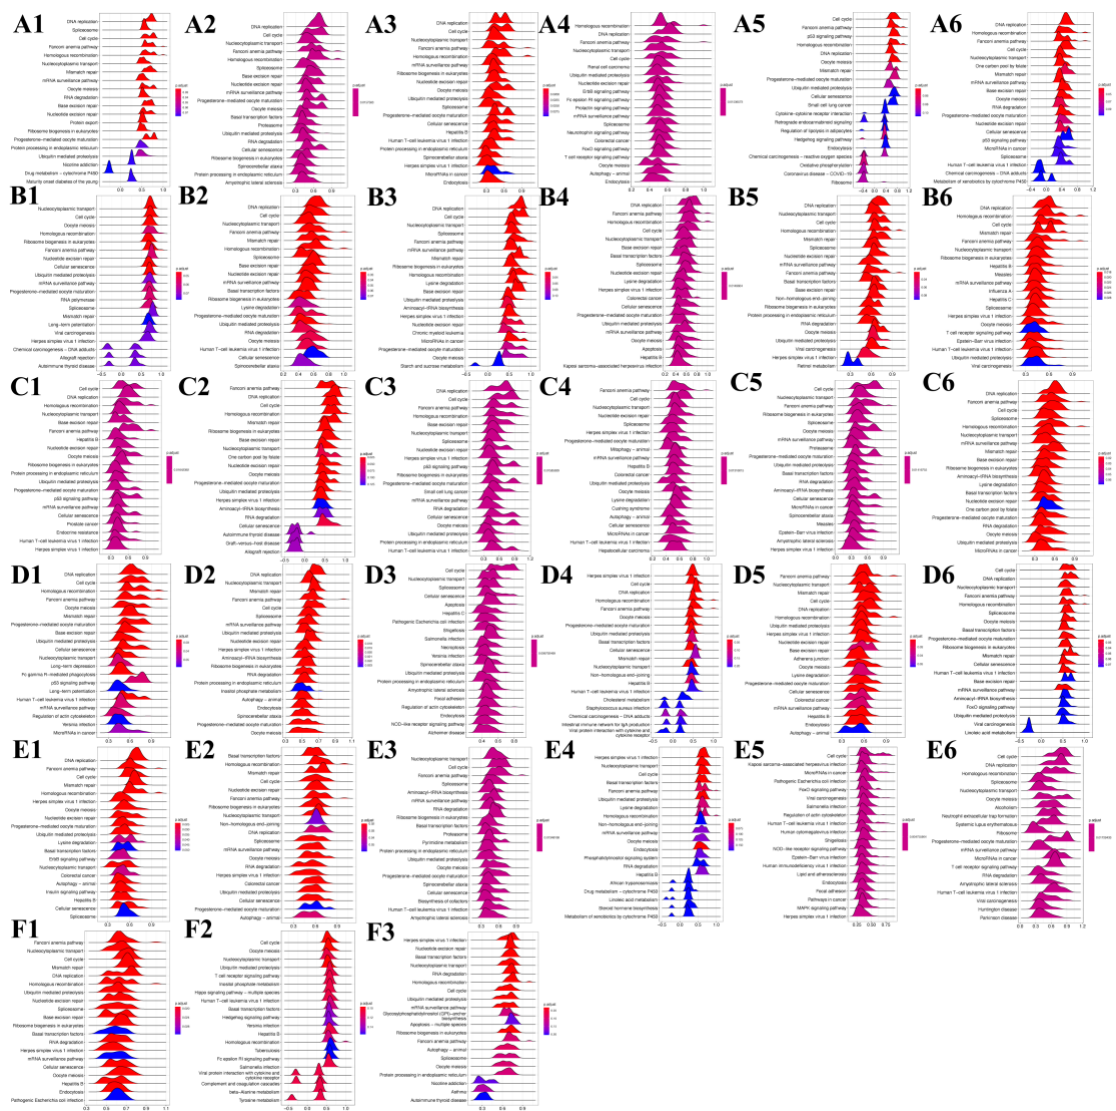

Supplement: f1 [file 4104639.f1.zip]

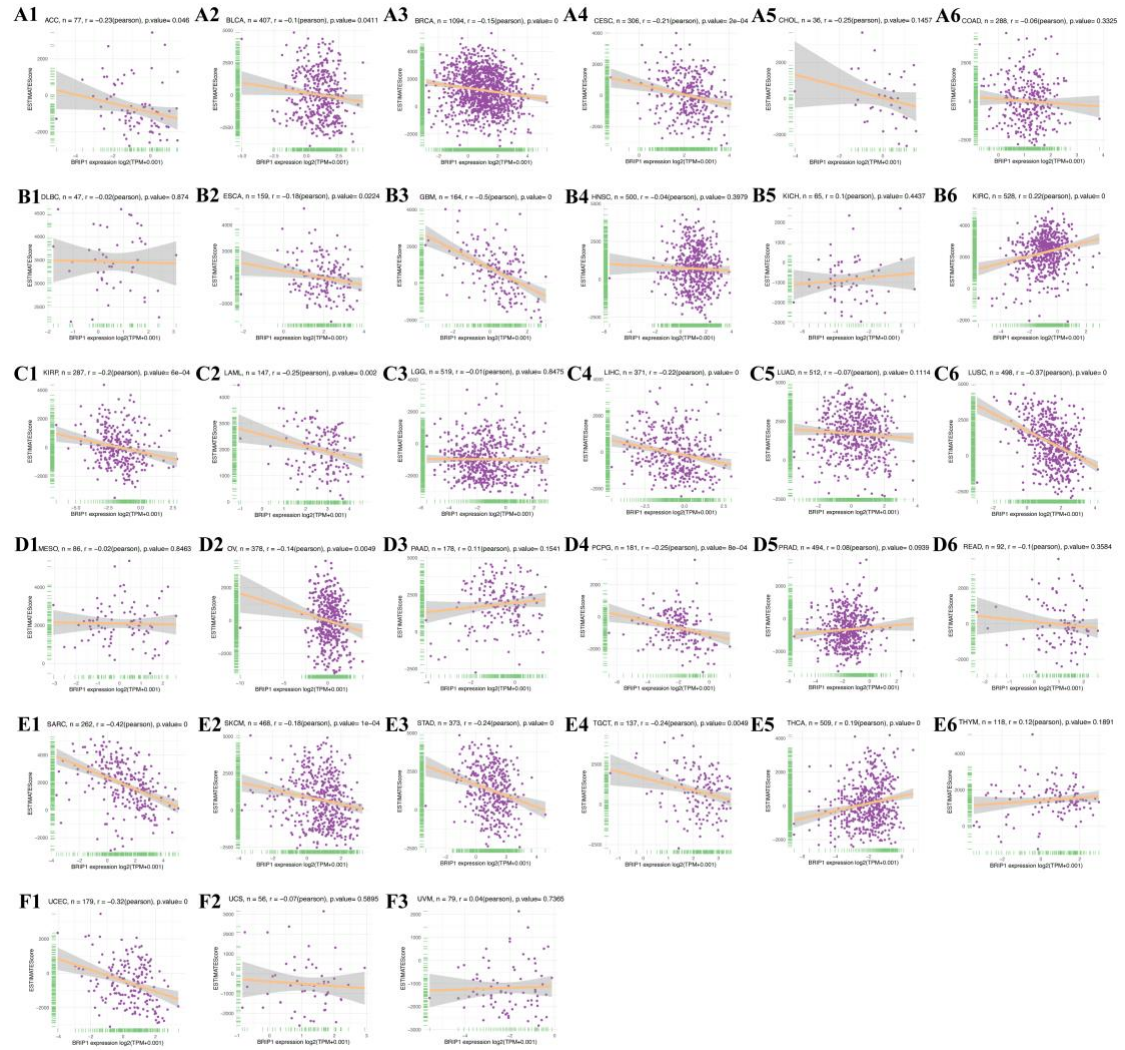

Supplement: f1 [file 4104639.f1.zip]

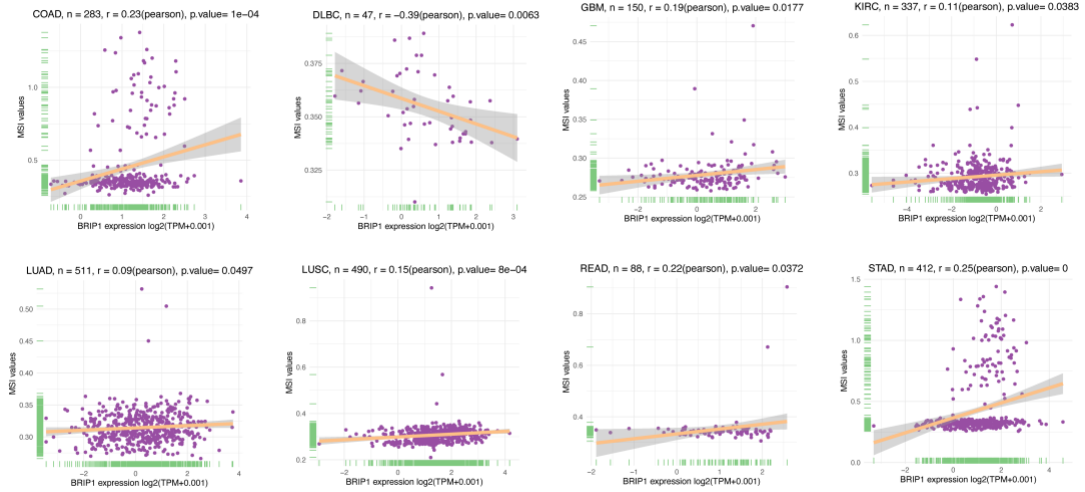

Supplement: f1 [file 4104639.f1.zip]

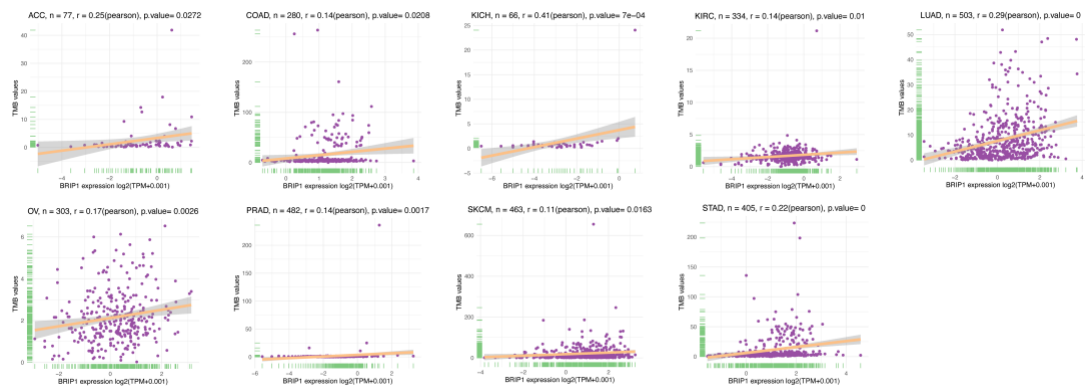

Supplement: f1 [file 4104639.f1.zip]

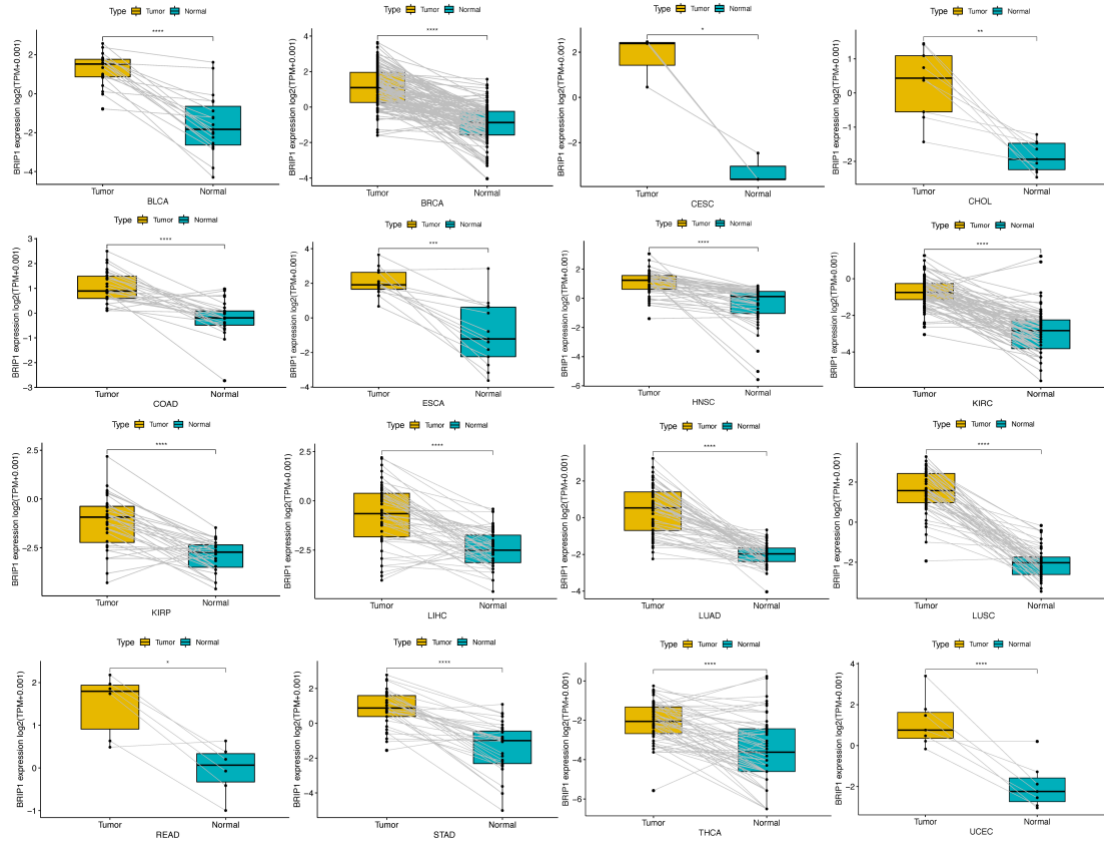

Supplement: f1 [file 4104639.f1.zip]
